# Supplementary material for: Single-cell transcriptomics reveals distinct effector profiles of infiltrating T cells in lupus skin and kidney
Source: PubMed Central journal article supplement (PMC9089784; doi:10.1172/jci.insight.156341), 2022-04-22
Supplement: jciinsight-7-156341-s027.pdf [file jciinsight-7-156341-s027.pdf]

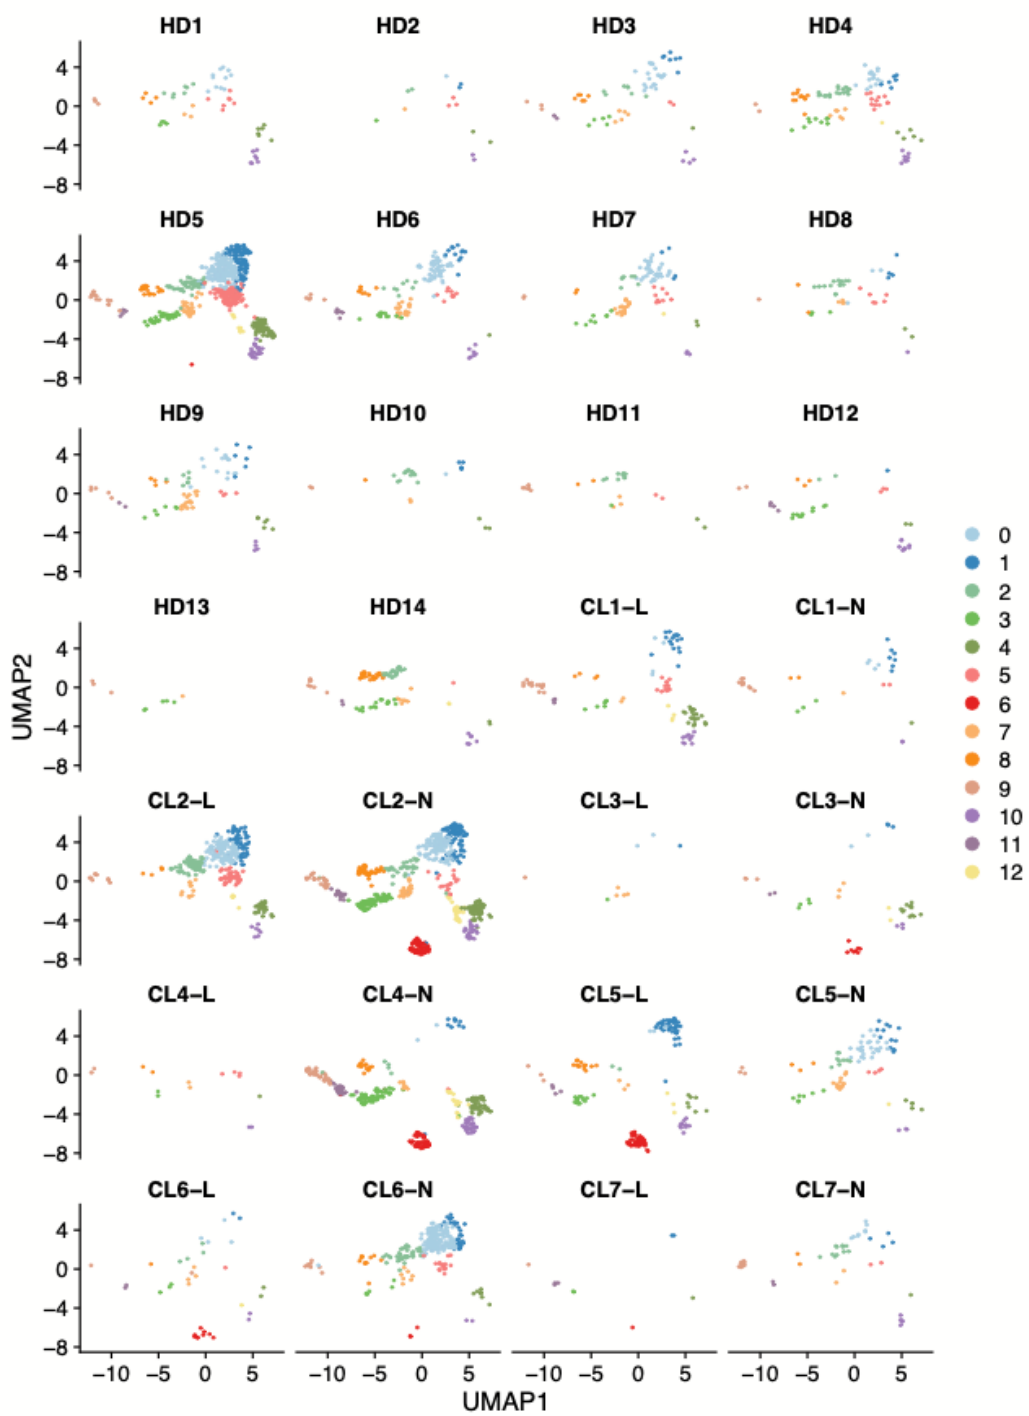

**Supplementary Figure 1.** UMAP plot locations of the cells from each sample.

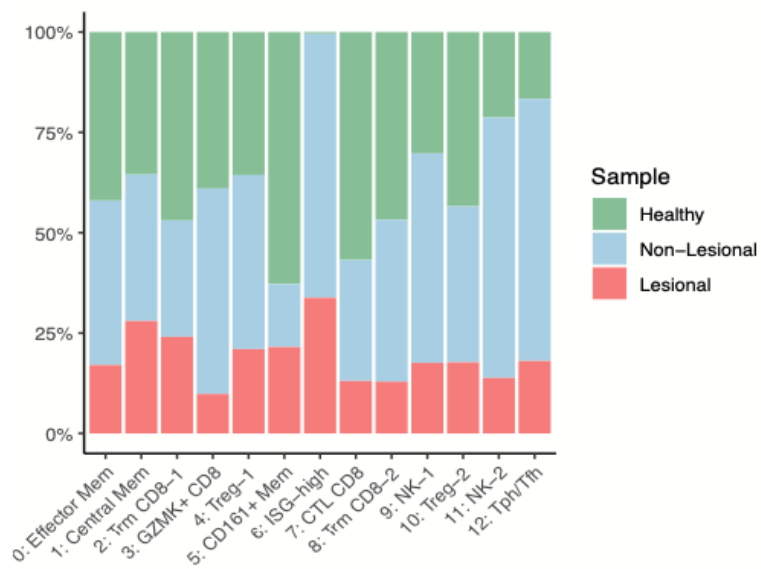

**Supplementary Figure 2.** Barplot of the healthy, non-lesional, and lesional components of each cluster.

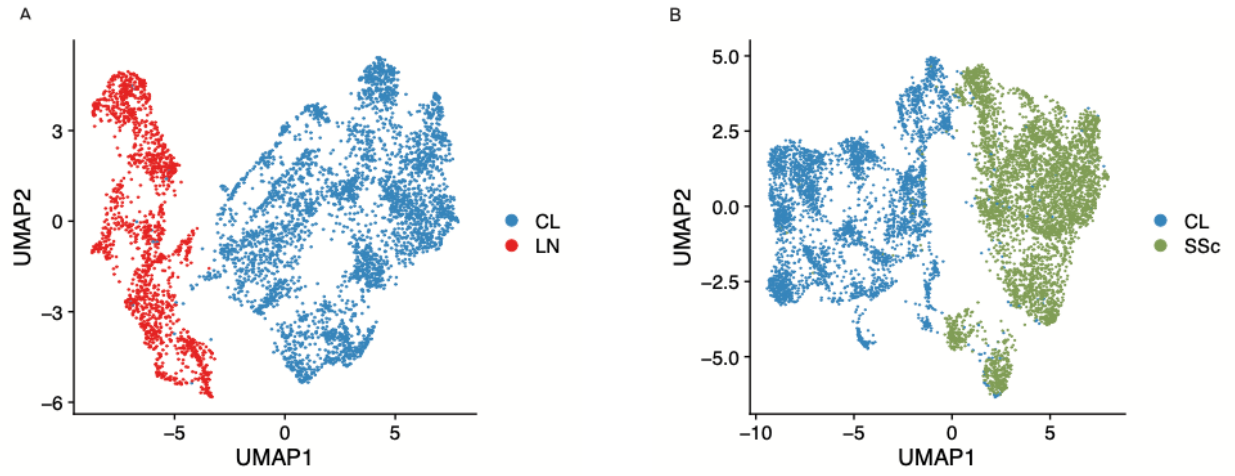

**Supplementary Figure 3. A.** UMAP plot of the merged cutaneous lupus (CL) and lupus nephritis (LN) datasets before CCA integration. **B.** UMAP plot of the merged CL and systemic sclerosis (SSc) datasets before CCA integration.

[See uploaded file]

**Supplementary Table 1.** Clinical characteristics of cutaneous lupus patients included in this study.

[See uploaded file]

**Supplementary Table 2.** Genes differentially expressed across T/NK clusters in skin biopsy samples.

[See uploaded file]

**Supplementary Table 3.** Signature gene lists for activation, cytotoxicity, exhaustion, and interferon response.
